# Supplementary material for: Matrixyl Patch vs Matrixyl Cream: A Comparative In Vivo Investigation of Matrixyl (MTI) Effect on Wound Healing
Source: PubMed Central journal article supplement — ACS Omega. 2022 Jul 11;7(28):24695–704. doi: 10.1021/acsomega.2c02592 (PMC9301720; doi:10.1021/acsomega.2c02592), 2022-07-11
Supplement: ao2c02592_si_001.pdf [file ao2c02592_si_001.pdf]

# Matrixyl-Patch vs Matrixyl-Cream: a comparative in-vivo investigation of Matrixyl (MTI) effect on wound healing

Maryam Kachooeian<sup>1</sup>, Zahra Mousivand<sup>2</sup>, Elham Sharifikolouei<sup>3</sup>, Mehrnoosh Shirangi<sup>1</sup>, Loghman Firoozpour<sup>4</sup>, Mohammad Raoufi<sup>2,5\*</sup>, Mohammad Sharifzadeh<sup>6\*\*</sup>

<sup>1</sup>Department of Drug and Food Control Faculty of Pharmacy, Tehran University of Medical Sciences, Tehran, Iran

<sup>2</sup>Nanotechnology Research Center, Faculty of Pharmacy, Tehran University of Medical Sciences, Tehran, Iran

<sup>3</sup>Department of Applied Science and Technology, Politecnico di Torino (POLITO), Turin, Italy

<sup>4</sup>Department of Medicinal Chemistry, Faculty of Pharmacy and Pharmaceutical Sciences Research Center, Tehran University of Medical Sciences, Tehran, Iran.

<sup>5</sup>Physical Chemistry I, Department of Chemistry and Biology & Research Center of Micro and Nanochemistry and Engineering (Cμ), University of Siegen, Siegen, Germany

<sup>6</sup>Department of Toxicology and Pharmacology, Faculty of Pharmacy, Tehran University of Medical Sciences, Tehran, Iran

**Kaiser test:** Kaiser test contains a solution containing Ninhydrin, which is very sensitive to the first type of amine. Ninhydrin reacts with the free amino head of the peptide chain, and its binding to the chain changes the color of the reaction to dark blue. This reactor does not react with the second type of amine, and it does not change colors.

## Quality control tests:

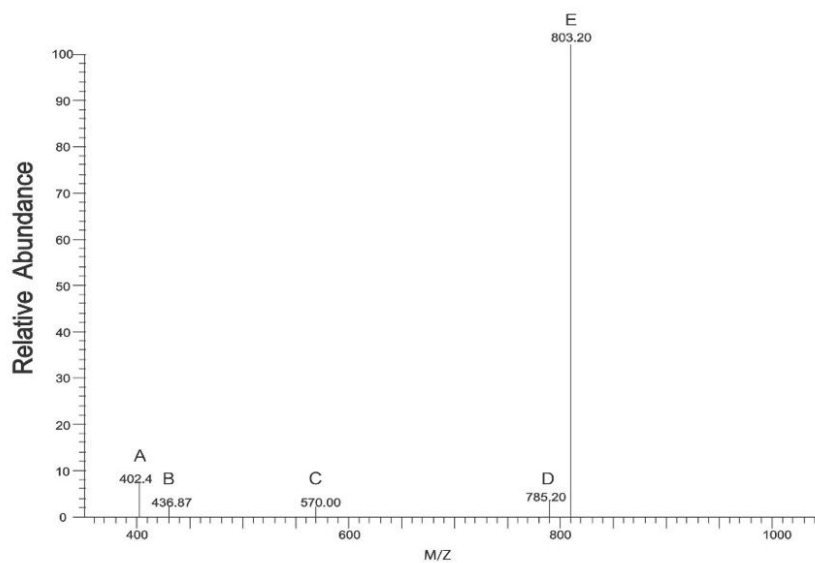

**Figure.S1:** Mass spectrum of synthesized peptide.  $A \rightarrow (M+2H^+)/2$ ,  $B \rightarrow KTTS+H^+$ ,

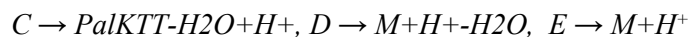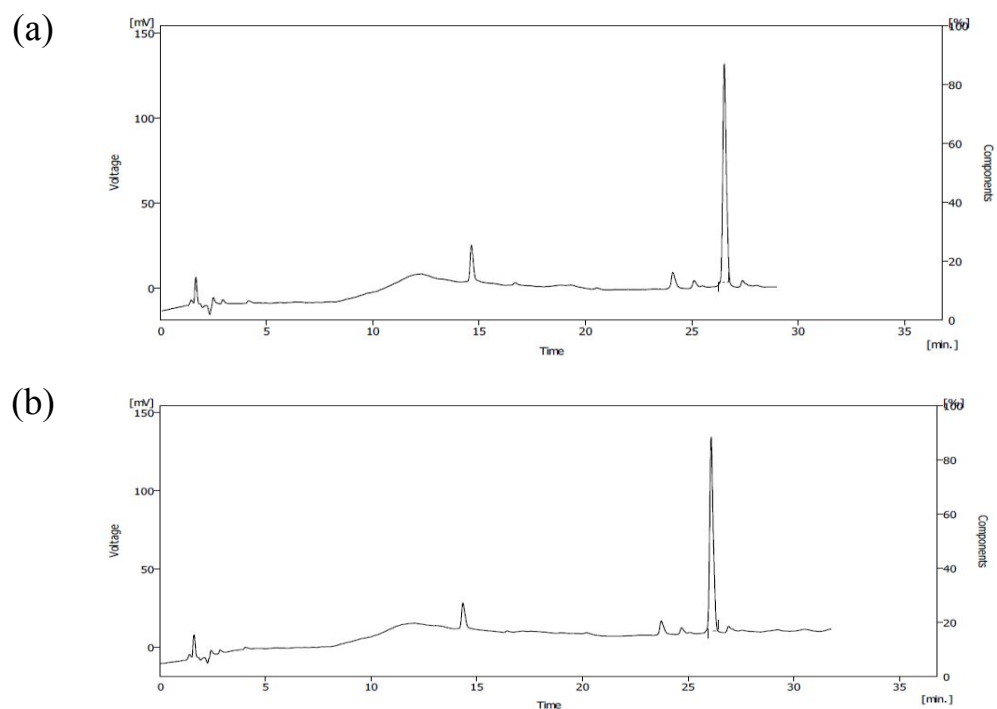

**Figure S2.** Controlling MTI assay after synthesis compared with commercially purchased Matrixyl powder, measured by HPLC **a)** LC Chromatogram of 100 ppm injection of commercially purchased Matrixyl powder as standard **b).** LC Chromatogram of 100 ppm injection of sample

**Table S1.** Assay on anhydrous basis of MTI. Powder MTI purchased from Sigma-Aldrich is used as standard here.

| Parameter  | Sample    | Standard |
|------------|-----------|----------|
| W(g)       | 0.01067   | 0.0101   |
| W(mg)      | 10.67     | 10.1     |
| ml         | 10        | 10       |
| DF         | 0.1       | 0.1      |
| LOD/KF     | 4.89      | 4.8      |
| W(reduced) | 4.89      | 4.8      |
| W correct  | 10.148237 | 9.6152   |
| ppm theory | 101.48237 | 96.152   |
| AUC 1      | 1272.586  | 1205.767 |

|            |             |             |
|------------|-------------|-------------|
| AUC 2      | 1285.782    | 1199.422    |
| AUC 3      | 1270.695    | 1195.969    |
| Mean       | 1276.354333 | 1200.386    |
| SD         | 8.219163238 | 4.969625036 |
| RSD(<2.0%) | 0.643956229 | 0.414002249 |
| ppm exp    | 102.2371319 |             |
| Assay      | 100.7       |             |

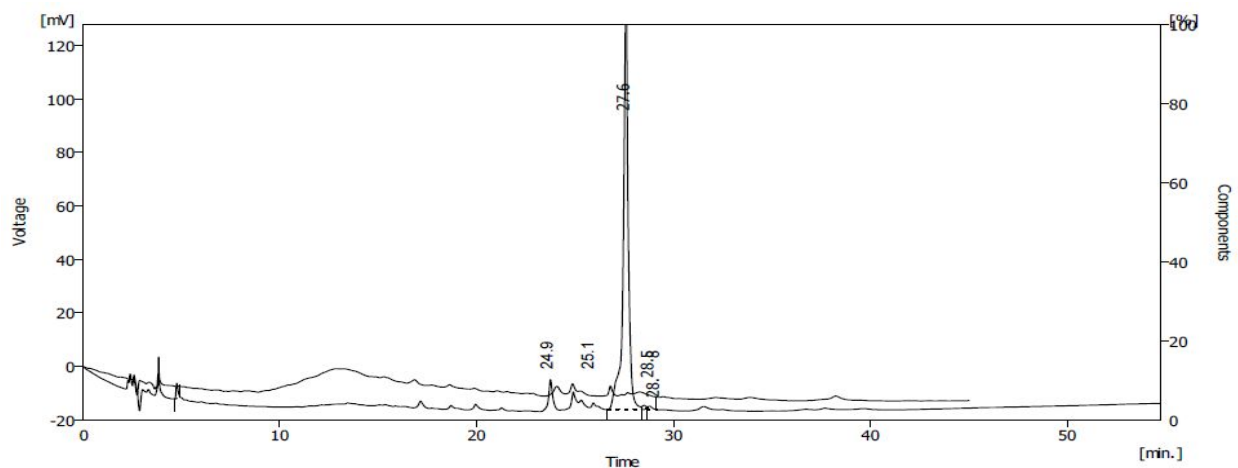

**Figure S3:** Measuring the purity of synthesized MTI by HPLC. LC Chromatogram of 100 ppm injection of MTI, compared with Distilled water as baseline.

**Table S2:** Purity determination of MTI

|   | Reten.time [min] | Area [mV.s] | Area [%] |
|---|------------------|-------------|----------|
| 1 | 24.9             | 23.270      | 0.82     |
| 2 | 25.1             | 14.731      | 0.52     |
| 3 | 26.2             | 2763.128    | 97.22    |
| 4 | 28.5             | 8.680       | 0.30     |
| 5 | 28.8             | 11.096      | 0.39     |
|   | Sum              | 2842.046    | 100.0    |

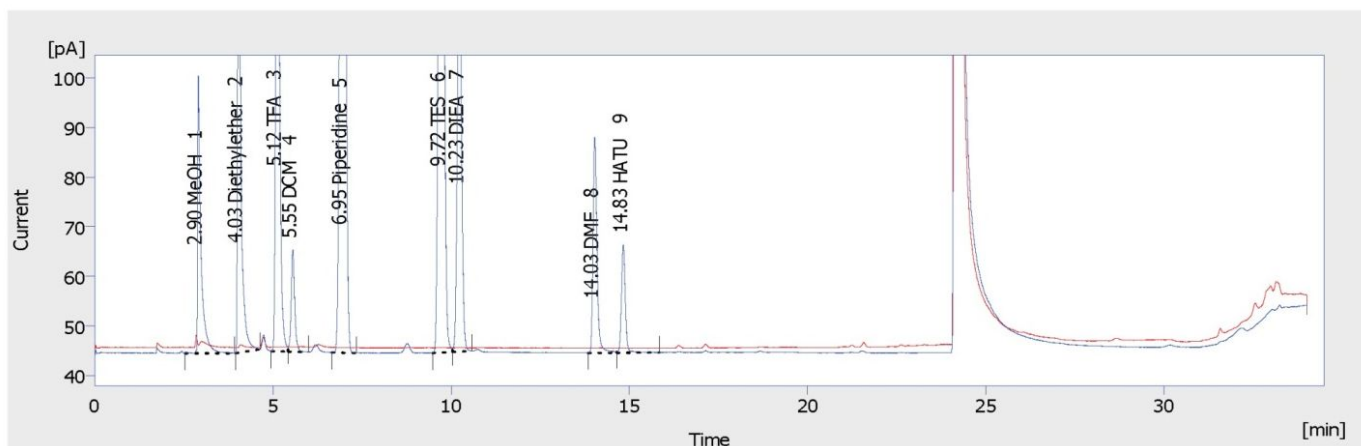

**Figure S4:** Determination of residual solvent after Matrixyl synthesis by gas chromatography

**Table S3.** pH determination of MTI for three replications

| MTI Samples | pH          |
|-------------|-------------|
| Sample 1    | 4.08        |
| Sample 2    | 4.07        |
| Sample 3    | 4.09        |
| Average     | 4.08 ± 0.01 |

**Table S4:** Moisture content of MTI measured by Karl Fischer test for four replications

| MTI samples | Moisture content (%) |
|-------------|----------------------|
| Sample 1    | 5.14                 |
| Sample 2    | 4.43                 |
| Sample 3    | 3.59                 |
| Sample 4    | 6.41                 |
| Average     | 4.89 ± 1.19          |
